# Supplementary material for: Insect-bacteria parallel evolution in multiple-co-obligate-aphid association: a case in Lachninae (Hemiptera: Aphididae)
Source: PubMed Central journal article supplement (PMC5579299; doi:10.1038/s41598-017-10761-9), 2017-08-31
Supplement: 41598_2017_10761_MOESM1_ESM.pdf [file 41598_2017_10761_MOESM1_ESM.pdf]

**Insect-bacteria parallel evolution in multiple-co-obligate-aphid association: a case in Lachninae (Hemiptera: Aphididae)**

**RUI CHEN<sup>1,†</sup>, ZHE WANG<sup>2,†</sup>, JING CHEN<sup>1\*</sup>, LI-YUN JIANG<sup>1</sup>, GE-XIA QIAO<sup>1,3\*</sup>**

<sup>1</sup> Key Laboratory of Zoological Systematics and Evolution, Institute of Zoology, Chinese Academy of Sciences, Beijing 100101, China; <sup>2</sup> Institute of Plant Protection, Liaoning Academy of Agricultural Sciences, Shenyang 110161, China; <sup>3</sup> College of Life Sciences, University of Chinese Academy of Sciences, Beijing 100049, China

† These authors contributed equally to this work.

\* Correspondences: Ge-Xia Qiao, Key Laboratory of Zoological Systematics and Evolution, Institute of Zoology, Chinese Academy of Sciences, Beijing, 100101, China. E-mail: qiaogx@ioz.ac.cn; Jing Chen, Key Laboratory of Zoological Systematics and Evolution, Institute of Zoology, Chinese Academy of Sciences, Beijing, 100101, China. E-mail: chenjing@ioz.ac.cn.

Running title: Insect-bacteria parallel evolution in Lachninae

## Tables of supplementary materials

Table S1. The detailed collected information of Lachninae species and GenBank accession numbers of *Buchnera aphidicola*.

| Host plant                    | Location                                  | No.voucher | GB number/16S | GB number/dnaB | GB number/groEL | GB number/ilvD | GB number/trpB |
|-------------------------------|-------------------------------------------|------------|---------------|----------------|-----------------|----------------|----------------|
| <i>Salix</i> sp.              | CHINA: Shandong: Qingdao City             | 13351      | KP866502      | —              | KY808126        | KY808224       | —              |
| <i>Taxus</i> sp.              | CHINA: Tibet: Gongbo'gyamda County        | 13506      | KP866420      | KY808048       | KY808127        | —              | KY808314       |
| <i>Pinus tabulaeformis</i>    | CHINA: Tibet: Bayi Town                   | 13512      | KP866466      | —              | KY808128        | —              | —              |
| <i>Pinus densata</i>          | CHINA: Tibet: Linzhi County               | 13519      | KP866467      | —              | KY808129        | —              | —              |
| <i>Salix</i> sp.              | CHINA: Tibet: Linzhi County               | 13539      | KP866504      | KY808049       | KY808130        | KY808225       | —              |
| <i>Larix</i> sp.              | CHINA: Tibet: Gongbo'gyamda County        | 13545      | KP866430      | KY808050       | KY808131        | KY808226       | KY808315       |
| <i>Larix chinensis</i>        | CHINA: Shaanxi : Mei County               | 13557      | KP866431      | KY808051       | KY808132        | KY808227       | KY808316       |
| Rosaceae                      | CHINA: Xinjiang: Nilka County             | 13796      | KP866487      | KY808052       | KY808133        | KY808228       | —              |
| Rosaceae                      | CHINA: Xinjiang: Nilka County             | 13797      | KP866488      | KY808053       | KY808134        | KY808229       | —              |
| <i>Phaseolus vulgaris</i>     | CHINA: Xinjiang: Nilka County             | 13818      | KP866489      | KY808054       | KY808135        | KY808230       | —              |
| <i>Pinus tabulaeformis</i>    | CHINA: Jilin: Changbai County             | 14984      | KP866457      | —              | KY808136        | KY808231       | KY808317       |
| <i>Platycladus orientalis</i> | CHINA: Tibet: Linzhi County               | 15413      | KP866448      | KY808055       | KY808137        | KY808232       | —              |
| <i>Larix</i> sp.              | CHINA: Sichuan: Wolong Town               | 15552      | KP866423      | KY808056       | KY808138        | KY808233       | KY808318       |
| <i>Cyclobalanopsis glauca</i> | CHINA: Guizhou: Daozhen County            | 15587      | KP866483      | KY808057       | KY808139        | —              | —              |
| <i>Liquidambar formosana</i>  | CHINA: Guizhou : Daozhen County           | 15627      | KP866486      | —              | KY808140        | KY808234       | —              |
| <i>Pinus sylvestris</i>       | CHINA: Inner Mongolia: Jiagedaqi District | 15766      | KP866444      | KY808058       | KY808141        | KY808235       | KY808319       |
| <i>Pinus sylvestris</i>       | CHINA: Inner Mongolia: Hulun Buir         | 15921      | KP866445      | KY808059       | KY808142        | KY808236       | KY808320       |
| <i>Pinus tabulaeformis</i>    | CHINA: Beijing                            | 16073      | KP866429      | KY808060       | —               | —              | KY808321       |
| <i>Pinus bungeana</i>         | CHINA: Beijing                            | 16107      | KP866414      | KY808061       | KY808143        | KY808237       | KY808322       |
| <i>Pinus tabuliformis</i>     | CHINA: Beijing                            | 16155      | KP866426      | KY808062       | KY808144        | KY808238       | KY808323       |
| <i>Quercus</i> sp.            | CHINA: Tibet: Chayu County                | 16374      | KP866479      | KY808063       | KY808145        | —              | —              |
| <i>Picea asperata</i>         | CHINA: Tibet: Zhangmu Town                | 16505      | KP866413      | KY808064       | KY808146        | KY808239       | KY808324       |
| <i>Pinus yunnanensis</i>      | CHINA: Sichuan: Yanbian County            | 17122      | KP866455      | —              | KY808147        | —              | —              |
| <i>Pinus armandi</i>          | CHINA: Sichuan: Meigu County              | 17262      | KP866437      | KY808065       | KY808148        | —              | KY808325       |

|                               |                                     |       |          |          |          |          |          |
|-------------------------------|-------------------------------------|-------|----------|----------|----------|----------|----------|
| <i>Castanea mollissima</i>    | CHINA: Shaanxi: Foping County       | 17287 | KP866480 | KY808066 | KY808149 | KY808240 | —        |
| <i>Platycladus orientalis</i> | CHINA: Shaanxi : Foping County      | 17290 | KY808034 | KY808067 | KY808150 | KY808241 | —        |
| <i>Quercus</i> sp.            | CHINA: Liaoning: Anshan City        | 17539 | KP866473 | —        | KY808151 | KY808242 | —        |
| <i>Salix</i> sp.              | CHINA: Heilongjiang: Mishan City    | 17705 | KP866505 | KY808068 | KY808152 | KY808243 | —        |
| <i>Pinus sylvestris</i>       | CHINA: Heilongjiang: Fujing City    | 17746 | KP866460 | —        | KY808153 | KY808244 | KY808326 |
| <i>Pinus sylvestris</i>       | CHINA: Heilongjiang: Fujing City    | 17755 | KP866468 | KY808069 | KY808154 | KY808245 | KY808327 |
| <i>Larix</i> sp.              | CHINA: Heilongjiang: Yichun City    | 17808 | KP866424 | KY808070 | KY808155 | KY808246 | KY808328 |
| Pinaceae                      | CHINA: Heilongjiang: Yichun City    | 17836 | KP866441 | KY808071 | KY808156 | KY808247 | KY808329 |
| <i>Picea asperata</i>         | CHINA: Heilongjiang : Yichun City   | 17837 | KP866434 | KY808072 | KY808157 | KY808248 | KY808330 |
| <i>Pinus sylvestris</i>       | CHINA: Inner Mongolia: Yakeshi City | 17928 | KP866412 | —        | —        | —        | KY808331 |
| <i>Pinus sylvestris</i>       | CHINA: Inner Mongolia: Yakeshi City | 17940 | KY808035 | KY808073 | KY808158 | KY808249 | KY808332 |
| <i>Pinus massoniana</i>       | CHINA: Fujian : Wuyi Mountains      | 18072 | KP866427 | KY808074 | KY808159 | KY808250 | KY808333 |
| <i>Pinus yunnanensis</i>      | CHINA: Yunnan: Kunming City         | 18161 | KP866439 | KY808075 | KY808160 | KY808251 | KY808334 |
| <i>Salix</i> sp.              | CHINA: Yunnan: Chuxiong City        | 18193 | KP866506 | KY808076 | KY808161 | KY808252 | —        |
| <i>Pinus yunnanensis</i>      | CHINA: Yunnan : Lijiang City        | 18216 | KP866428 | KY808077 | KY808162 | KY808253 | KY808335 |
| <i>Pinus yunnanensis</i>      | CHINA: Yunnan: Lijiang City         | 18220 | KY808036 | —        | KY808163 | —        | —        |
| <i>Abies</i> sp.              | CHINA: Yunnan: Lugu Lake            | 18253 | KP866421 | KY808078 | KY808164 | —        | KY808336 |
| <i>Platycladus orientalis</i> | CHINA: Yunnan: Ninglang County      | 18648 | KP866449 | KY808079 | KY808165 | KY808254 | —        |
| <i>Abies</i> sp.              | CHINA: Yunnan : Shangrila County    | 18657 | KP866422 | KY808080 | KY808166 | —        | KY808337 |
| <i>Pinus yunnanensis</i>      | CHINA: Deqin County                 | 18689 | KY808037 | KY808081 | KY808167 | KY808255 | KY808338 |
| <i>Pinus armandi</i>          | CHINA: Yunnan: Jianchuan County     | 18720 | KP866462 | —        | KY808168 | KY808256 | KY808339 |
| <i>Pinus bungeana</i>         | CHINA: Beijing                      | 18821 | KP866415 | KY808082 | KY808169 | KY808257 | KY808340 |
| <i>Pinus bungeana</i>         | CHINA: Beijing                      | 18841 | KP866416 | KY808083 | KY808170 | KY808258 | KY808341 |
| Fagaceae                      | CHINA: Guangxi: Guilin City         | 18876 | KP866475 | KY808084 | KY808171 | KY808259 | —        |
| <i>Salix</i> sp.              | CHINA: Beijing                      | 19106 | KP866499 | KY808085 | KY808172 | KY808260 | —        |
| <i>Keteleeria fortunei</i>    | CHINA: Liaoning: Shenyang City      | 19386 | KY808038 | KY808086 | —        | —        | KY808342 |
| <i>Carya cathayensis</i>      | CHINA: Beijing                      | 19444 | KP866501 | KY808087 | KY808173 | KY808261 | —        |
| <i>Betula</i> sp.             | CHINA: Beijing                      | 19448 | KP866496 | KY808088 | KY808174 | KY808262 | —        |
| <i>Betula</i> sp.             | CHINA: Beijing                      | 19452 | KP866497 | KY808089 | KY808175 | KY808263 | —        |
| <i>Pinus tabulaeformis</i>    | CHINA: Beijing                      | 19458 | KY808039 | KY808090 | —        | —        | KY808343 |
| <i>Pinus tabulaeformis</i>    | CHINA: Liaoning: Anshan City        | 20124 | KP866458 | —        | KY808176 | KY808264 | KY808344 |

|                            |                                          |       |          |          |          |          |          |
|----------------------------|------------------------------------------|-------|----------|----------|----------|----------|----------|
| <i>Pyrus pyrifolia</i>     | CHINA: Anhui: Yuexi County               | 20199 | KP866490 | KY808091 | KY808177 | KY808265 | —        |
| <i>Picea asperata</i>      | CHINA: Ningxia: Jingyuan County          | 21107 | KP866435 | KY808092 | KY808178 | KY808266 | KY808345 |
| <i>Pinus koraiensis</i>    | CHINA: Jilin: Longjing City              | 21266 | KP866442 | KY808093 | KY808179 | KY808267 | KY808346 |
| <i>Pinus koraiensis</i>    | CHINA: Jilin: Yanbian City               | 21300 | KP866443 | KY808094 | KY808180 | KY808268 | KY808347 |
| <i>Pinus tabulaeformis</i> | CHINA: Ningxia: Guyuan City              | 21563 | KP866440 | KY808095 | KY808181 | KY808269 | KY808348 |
| <i>Larix sibirica</i>      | MONGOLIA: Ulan Bator City                | 22375 | KP866432 | KY808096 | KY808182 | KY808270 | KY808349 |
| <i>Eribotrya japonica</i>  | CHINA: Sichuan: Chengdu City             | 22522 | KP866493 | KY808097 | KY808183 | KY808271 | —        |
| Pinaceae                   | CHINA: Sichuan: Batang County            | 22682 | KP866436 | KY808098 | KY808184 | KY808272 | KY808350 |
| <i>Larix</i> sp.           | MONGOLIA: Kente Mountain                 | 22710 | KP866425 | KY808099 | KY808185 | KY808273 | KY808351 |
| <i>Pinus armandi</i>       | CHINA: Gansu: Tianshui City              | 23074 | KY808040 | KY808100 | KY808186 | —        | KY808352 |
| <i>Pyrus</i> sp.           | CHINA: Yunnan: Jingdong County           | 23760 | KP866491 | KY808101 | KY808187 | KY808274 | —        |
| <i>Pinus yunnanensis</i>   | CHINA: Yunnan: Longling County           | 24090 | KP866456 | —        | KY808188 | —        | —        |
| <i>Pinus tabulaeformis</i> | CHINA: Beijing                           | 24412 | KP866459 | —        | KY808189 | KY808275 | KY808353 |
| <i>Eribotrya japonica</i>  | CHINA: Yunnan: Chenghai Lake             | 24823 | KY80804  | KY808102 | —        | KY808276 | KY808354 |
| <i>Pinus armandi</i>       | CHINA: Yunnan: Kunming City              | 24880 | KP866417 | —        | —        | —        | —        |
| <i>Picea asperata</i>      | CHINA: Inner Mongolia: Alashan Left City | 25103 | KP866433 | KY808103 | KY808190 | KY808277 | KY808355 |
| Fagaceae                   | CHINA: Guangxi: Lingui County            | 26064 | KP866476 | KY808104 | KY808191 | KY808278 | —        |
| Fagaceae                   | CHINA: Guangxi: Lingui Country           | 26065 | KP866484 | KY808105 | KY808192 | KY808279 | —        |
| Fagaceae                   | CHINA: Guangxi: Lingui Country           | 26066 | KY80804  | KY808106 | KY808193 | KY808280 | —        |
| Fagaceae                   | CHINA: Guangxi: Huanjiang Country        | 26068 | KY80805  | KY808107 | KY808194 | KY808281 | —        |
| <i>Salix babylonica</i>    | CHINA: Shandong: Qingdao City            | 26547 | KP866500 | KY808108 | KY808195 | KY808282 | —        |
| <i>Celtis sinensis</i>     | CHINA: Shandong: Qingdao City            | 26549 | KP866503 | —        | KY808196 | KY808283 | —        |
| <i>Quercus</i> sp.         | CHINA: Taiwan: Taibei City               | 26564 | KP866477 | KY808109 | KY808197 | KY808284 | —        |
| <i>Pyrus</i> sp.           | CHINA: Taiwan: Taizhong County           | 26565 | KP866492 | KY808110 | KY808198 | KY808285 | —        |
| <i>Pinus tabuliformis</i>  | RUSSIA: St.Petersburg City               | 27139 | KP866461 | —        | KY808199 | KY808286 | KY808356 |
| <i>Picea asperata</i>      | CHINA: Inner Mongolia: Alashan Left City | 27377 | KP866446 | KY808111 | KY808200 | KY808287 | —        |
| <i>Picea asperata</i>      | CHINA: Inner Mongolia: Alashan Left City | 27387 | KP866447 | KY808112 | KY808201 | KY808288 | —        |
| <i>Pinus armandi</i>       | CHINA: Beijing                           | 27402 | KP866438 | KY808113 | KY808202 | KY808289 | KY808357 |
| <i>Cichorium endivia</i>   | CHINA: Inner Mongolia: Daqing Mountain   | 27667 | KY808044 | —        | KY808203 | —        | KY808358 |
| Salicaceae                 | CHINA: Yunnan: Yulong Mountain           | 27887 | KP866495 | KY808114 | —        | KY808290 | —        |
| <i>Pinus yunnanensis</i>   | CHINA: Yunnan: Shibao Mountain           | 28025 | KP866471 | KY808115 | KY808204 | KY808291 | KY808359 |

|                                     |                                        |        |          |          |          |          |          |
|-------------------------------------|----------------------------------------|--------|----------|----------|----------|----------|----------|
| <i>Pinus yunnanensis</i>            | CHINA: Yunnan: Weibao Mountain         | 28067  | KP866452 | —        | KY808205 | KY808292 | KY808360 |
| <i>Artemisia sp.</i>                | CHINA: Gansu: Diebu Country            | 28177  | KP866507 | —        | KY808206 | KY808293 | —        |
| <i>Pinus tabuliformis</i>           | CHINA: Shannxi: Hu Country             | 28215  | KP866470 | KY808116 | KY808207 | KY808294 | KY808361 |
| <i>Cichorium endivia</i>            | CHINA: Henan: Gongyi Country           | 28237  | KP866510 | KY808117 | KY808208 | KY808295 | —        |
| <i>Cichorium endivia</i>            | CHINA: Henan: Gongyi Country           | 28238  | KP866511 | KY808118 | KY808209 | KY808296 | —        |
| <i>Cedrus deodara</i>               | CHINA: Beijing                         | 29151  | KP866418 | KY808119 | KY808210 | KY808297 | —        |
| <i>Cichorium endivia</i>            | CHINA: Inner Mongolia: Daqing Mountain | 29246  | KY808045 | —        | KY808211 | KY808298 | —        |
| <i>Artemisia sp.</i>                | CHINA: Hubei: Shennongjia              | 29731  | KP866508 | —        | KY808212 | KY808299 | —        |
| <i>Pinus massoniana</i>             | CHINA: Chongqing City                  | 29813  | KP866469 | KY808120 | KY808213 | KY808300 | KY808362 |
| <i>Metasequoia glyptostroboides</i> | CHINA: Chongqing City                  | 29822  | KP866450 | KY808121 | KY808214 | KY808301 | KY808363 |
| <i>Artemisia sp.</i>                | CHINA: Sichuan: Jiuzhaigou Valley      | 30058  | KY808046 | —        | KY808215 | KY808302 | —        |
| <i>Apium graveolens</i>             | CHINA: Sichuan: Chengdu City           | 30104  | KP866509 | —        | KY808216 | KY808303 | —        |
| <i>Metasequoia glyptostroboides</i> | CHINA: Sichuan: Chengdu City           | 30106  | KP866451 | KY808122 | KY808217 | KY808304 | KY808364 |
| <i>Eribotrya japonica</i>           | CHINA: Yunnan: Kunming City            | 30435  | KY808047 | —        | —        | KY808305 | KY808365 |
| <i>Eribotrya japonica</i>           | CHINA: Yunnan: Wen Country             | 30441  | KP866494 | —        | —        | KY808306 | KY808366 |
| <i>Cedrus deodara</i>               | CHINA: Beijing                         | 30500  | KP866419 | KY808123 | KY808218 | KY808307 | —        |
| <i>Pinus ponderosa</i>              | USA: California: Los Angeles County    | CF1290 | KP866472 | KY808124 | —        | KY808308 | —        |
| <i>Pinus monophylla</i>             | USA: California: San Bernardino        | CF1291 | KP866453 | —        | KY808219 | KY808309 | KY808367 |
| <i>Pinus radiata</i>                | USA: California: Monterey County       | CF1323 | —        | —        | KY808220 | KY808310 | KY808368 |
| <i>Pinus contorta</i>               | USA: California: El Dorado County      | CR1335 | KP866454 | —        | KY808221 | KY808311 | KY808369 |
| <i>Quercus liaotungensis</i>        | CHINA: Beijing                         | Y8896  | KP866498 | —        | KY808222 | KY808312 | —        |
| <i>Quercus liaotungensis</i>        | CHINA: Beijing                         | Y8897  | KP866474 | KY808125 | KY808223 | KY808313 | —        |

Table S2. The sequences of outgroup and their GenBank accession numbers.

|                               | <i>16S</i> | <i>dnaB</i>  | <i>groEL</i> | <i>ilvD</i>  | <i>trpB</i>  |
|-------------------------------|------------|--------------|--------------|--------------|--------------|
| <i>Escherichia coli</i>       | CP018801   | DQ324464     | CU928160     | CU928160     | CU928160     |
| <i>Serratia symbiotica</i>    | NR_117521  | AENX01000092 | AENX01000136 | CCES01000003 | AENX01000230 |
| <i>Ishikawaella capsulata</i> | AB0677723  | NZ_AP010872  | NZ_AP010872  | NZ_AP010872  | NZ_AP010872  |
| <i>Salmonella enterica</i>    | CP012346   | AE014613     | AE014613     | AE014613     | AE014613     |

# Figures of supplementary materials

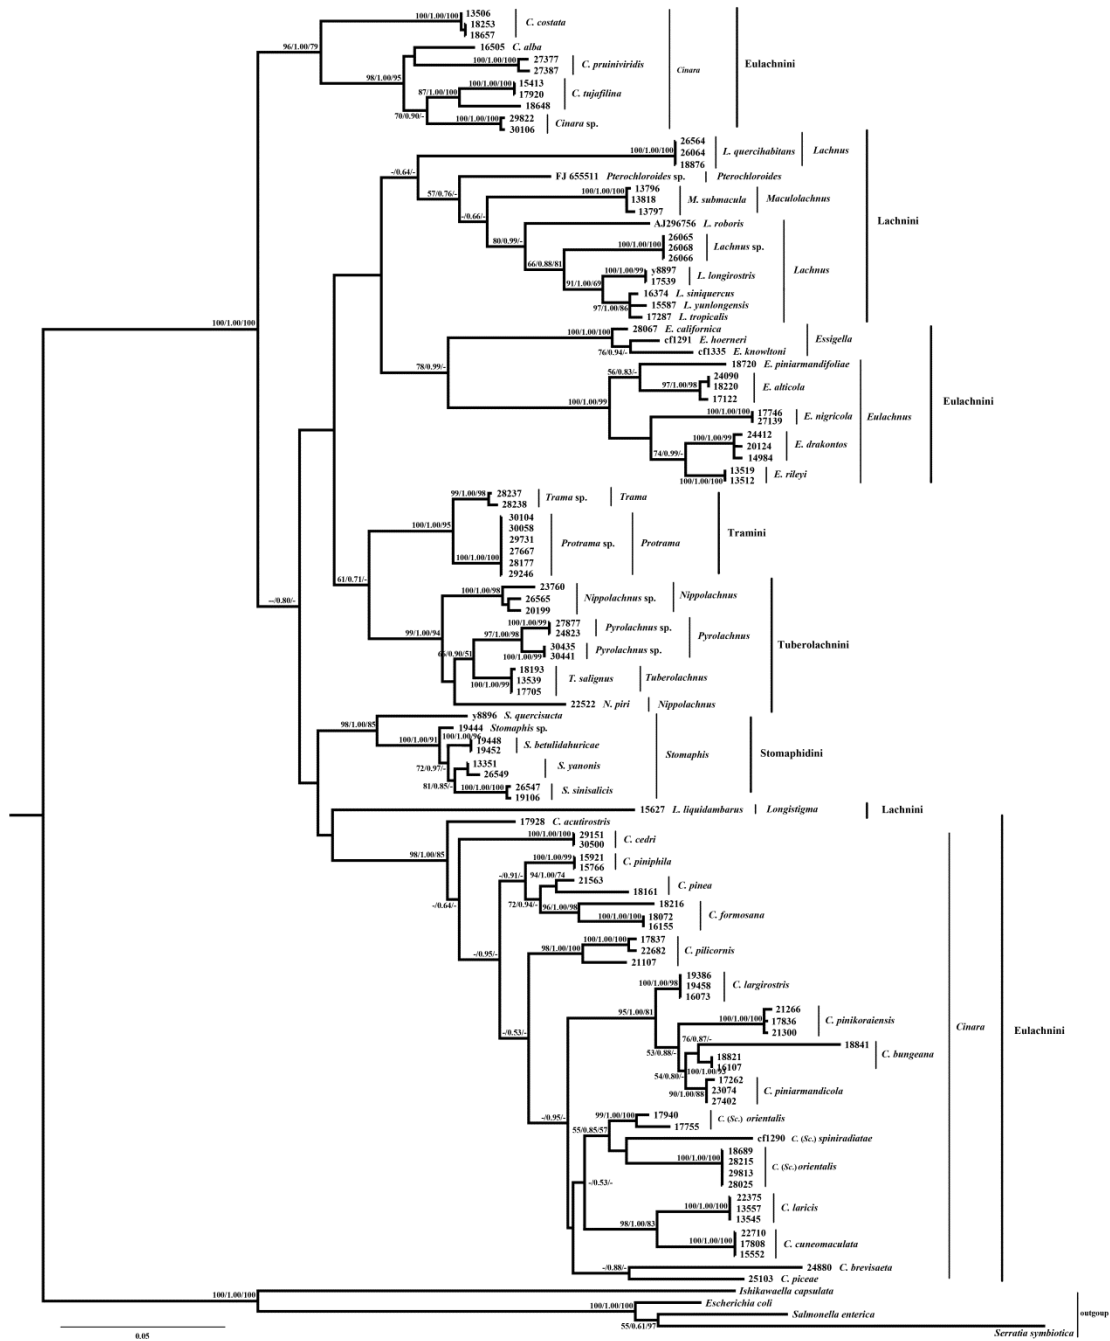

**Figure S1.** ML tree from the analyses of *Buchnera* in Lachninae based on the *16S rRNA* dataset.

Numbers near nodes refer to ML bootstrap support, Bayesian posterior probability, and MP bootstrap support.

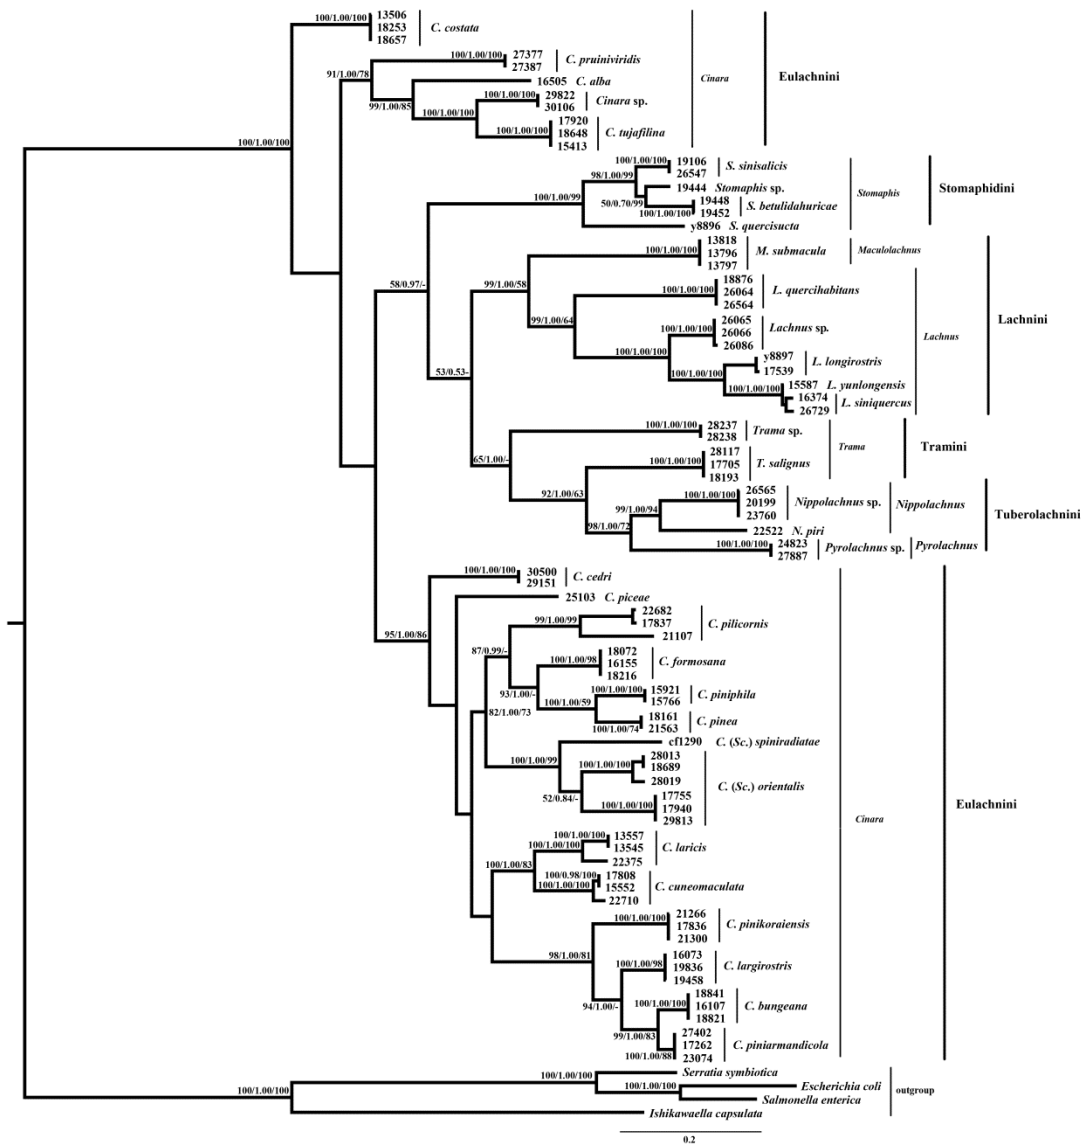

**Figure S2.** ML tree from the analyses of *Buchnera* in Lachninae based on the *dnaB* dataset. Numbers near nodes refer to ML bootstrap support, Bayesian posterior probability, and MP bootstrap support.



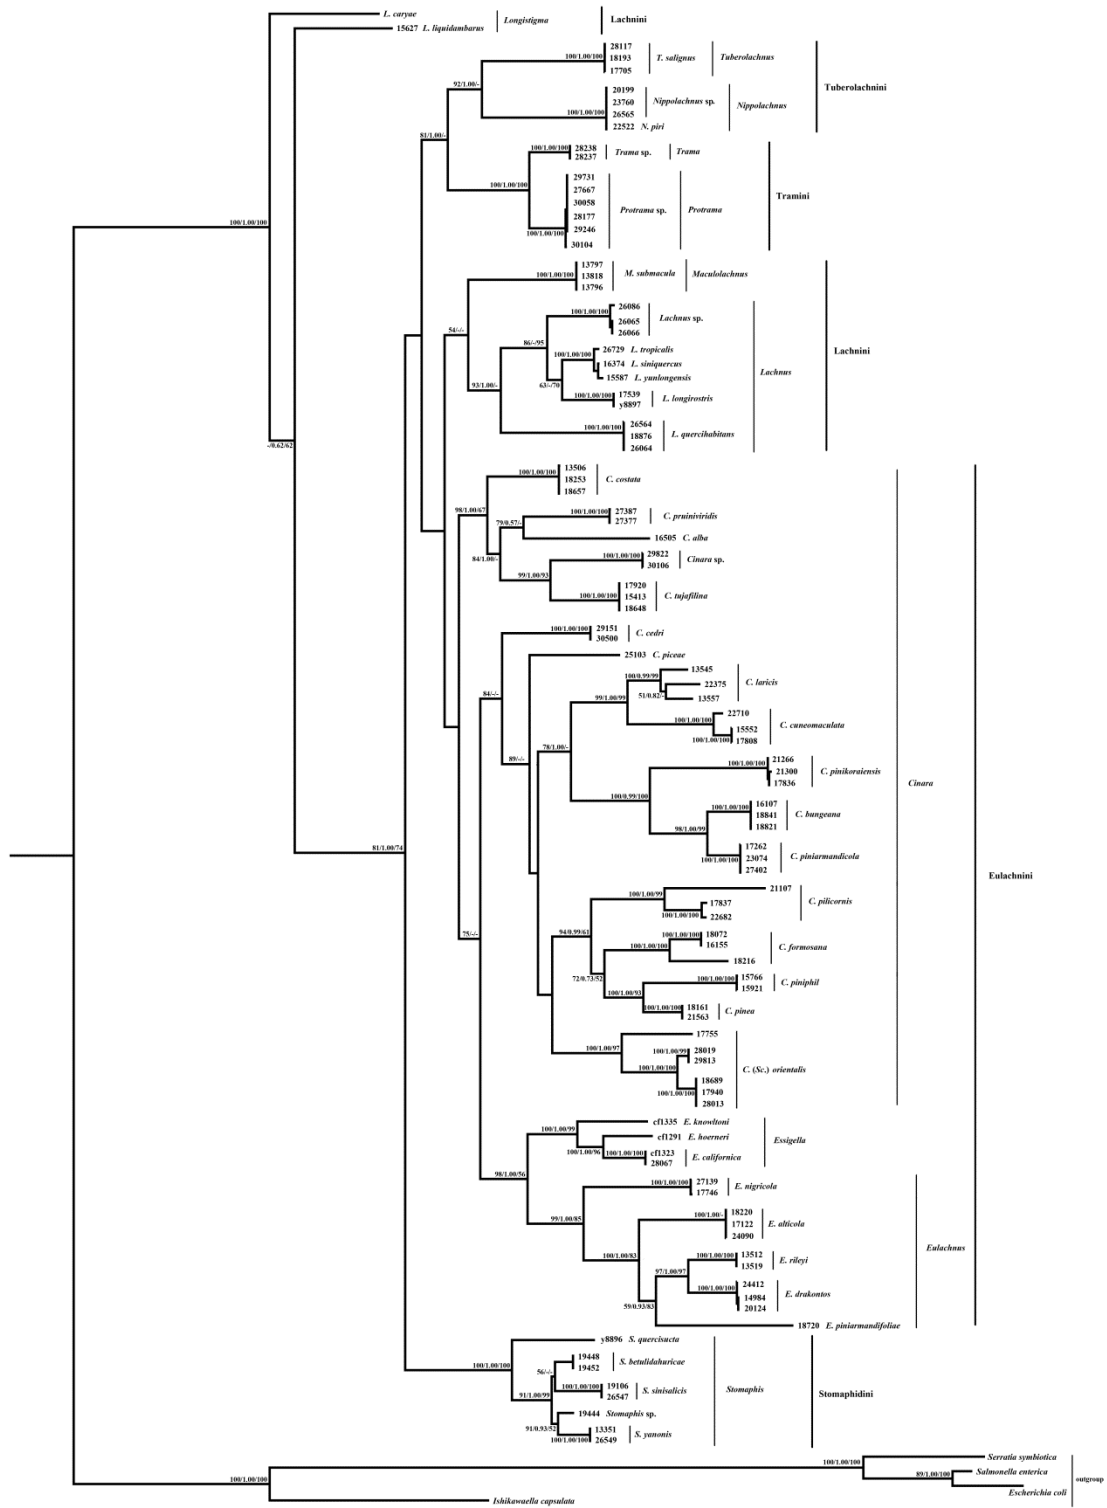

**Figure S3.** ML tree from the analyses of *Buchnera* in Lachninae based on the *groEL* dataset.

Numbers near nodes refer to ML bootstrap support, Bayesian posterior probability, and MP bootstrap support.

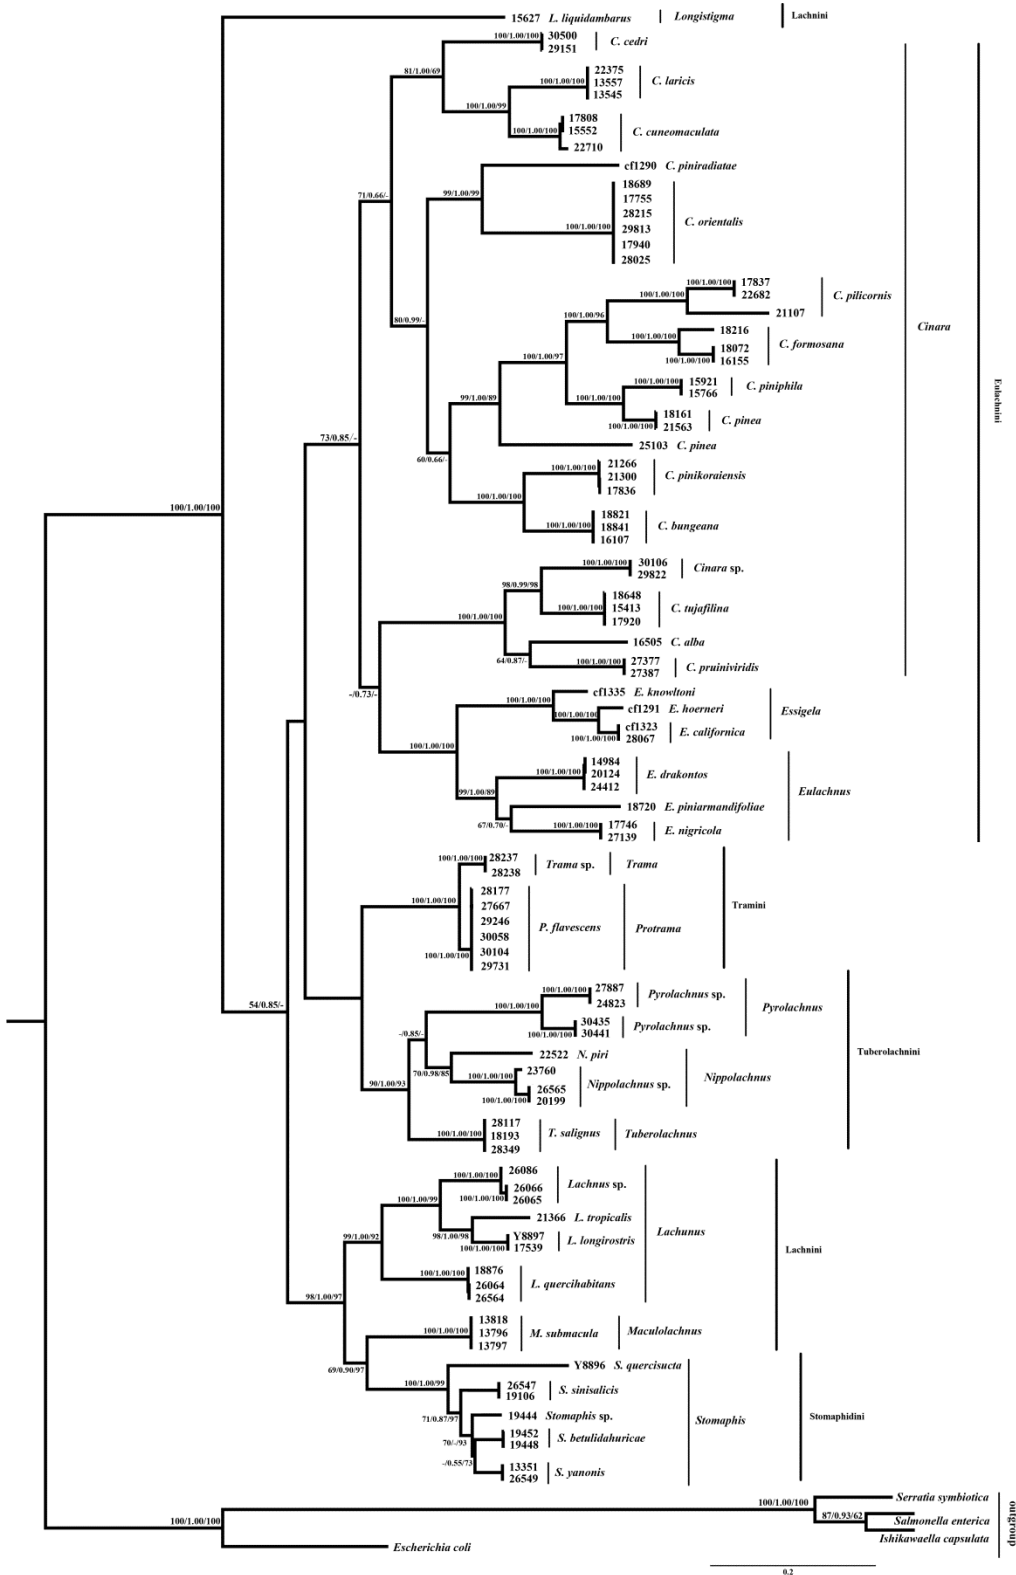

**Figure S4.** ML tree from the analyses of *Buchnera* in Lachninae based on the *ilvD* dataset. Numbers near nodes refer to ML bootstrap support, Bayesian posterior probability, and MP bootstrap support.

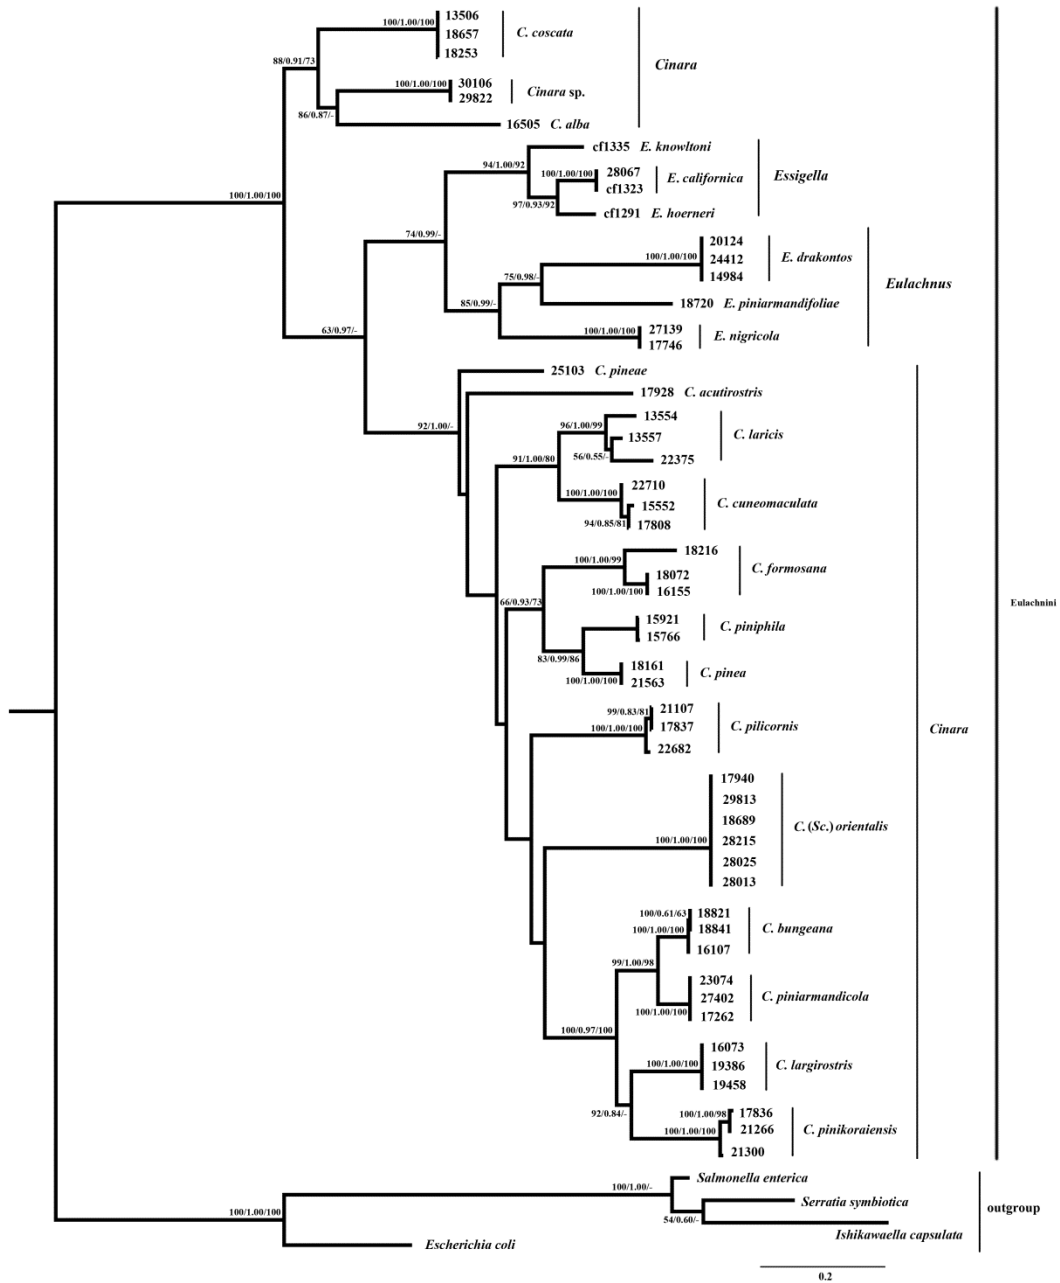

**Figure S5.** ML tree from the analyses of *Buchnera* in Lachninae based on the *trpB* dataset.

Numbers near nodes refer to ML bootstrap support, Bayesian posterior probability, and MP bootstrap support.
